# Supplementary material for: π-Extended hexadeca-substituted cobalt phthalocyanine as an active layer for organic field-effect transistors
Source: Royal Society of Chemistry journal article supplement (doi:10.1039/c8dt02948b), 2018-01-01
Supplement: c8dt02948b1.pdf [file c8dt02948b1.pdf]

## Electronic Supplementary Information

### $\pi$ -Extended Hexadeca-Substituted Cobalt Phthalocyanine as an Active Layer for Organic Field-Effect Transistors

İlgin Nar,<sup>a\*</sup> Armağan Atsay,<sup>a\*</sup> Hande Pekbelgin Karaoğlu<sup>a</sup>, Ahmet Altındal<sup>b</sup>, Esin Hamuryudan<sup>a</sup>

<sup>a</sup>Faculty of Science and Letters, Department of Chemistry, İstanbul Technical University, 34469 Maslak, İstanbul, Turkey

<sup>b</sup>Faculty of Science and Art, Department of Physics, Yıldız Technical University, 34722 Esenler, İstanbul, Turkey

#### Table of Contents

|                                                                                                                       |    |
|-----------------------------------------------------------------------------------------------------------------------|----|
| General Information.....                                                                                              | 2  |
| UV-Vis Spectra of 3 and 4.....                                                                                        | 3  |
| <b>Fig. S1</b> UV-Vis spectrum of 3 and 4 in CHCl <sub>3</sub> .....                                                  | 3  |
| NMR spectra of 3 and 4.....                                                                                           | 4  |
| <b>Fig. S2</b> <sup>1</sup> H NMR spectrum of 2 in CDCl <sub>3</sub> .....                                            | 4  |
| <b>Fig. S3</b> <sup>13</sup> C NMR spectrum of 2 in CDCl <sub>3</sub> .....                                           | 4  |
| <b>Fig. S4</b> <sup>1</sup> H NMR spectrum of 3 in CDCl <sub>3</sub> .....                                            | 5  |
| <b>Fig. S5</b> <sup>13</sup> C NMR spectrum of 3 in CDCl <sub>3</sub> .....                                           | 5  |
| <b>Fig. S6</b> <sup>1</sup> H NMR spectrum of 4 in CDCl <sub>3</sub> .....                                            | 6  |
| <b>Fig. S7</b> <sup>13</sup> C NMR spectrum of 4 in CDCl <sub>3</sub> .....                                           | 6  |
| X-ray structure of 4.....                                                                                             | 7  |
| <b>Fig. S8</b> Asymmetric unit structure of 4 with atomic numbering. ....                                             | 7  |
| <b>Fig. S9</b> J-V characteristic of the Au/PMMA/p-Si structure.....                                                  | 8  |
| <b>Fig. S10</b> Reverse bias J-V characteristic of the device. ....                                                   | 8  |
| <b>Fig. S11</b> Modelling of the J-V data according to (a) Pole-Frenkel emission (b) Fowler–Nordheim tunnelling. .... | 9  |
| <b>Fig. S12</b> Frequency dependence of the capacitance density for the Au/PMMA/p-Si structure.....                   | 10 |
| Table S1. Crystal data and structure refinement details for compounds 4 .....                                         | 11 |
| References.....                                                                                                       | 12 |

## General Information

All NMR spectra were recorded on Agilent VNMRs 500 MHz at 25 °C and chemical shifts were referenced internally using the residual solvent resonances. Mass spectra were measured on a MALDI (matrix assisted laser desorption ionization) BRUKER Microflex LT using Dithranol (DIT; 1,8-dihydroxy-9,10-dihydroanthracen-9-one) as the matrix. The elemental analysis was performed on a Costech ECS 4010 CHNS elemental analyzer. All reagents and solvents were of reagent grade quality obtained from commercial suppliers. Electrochemical measurements were carried out using a Gamry 600 Potentiostat/Galvanostat. The cell comprised inlets for a glassy carbon working electrode, a platinum wire counter electrode and a saturated calomel electrode (SCE) reference electrode. Typically, a 0.1 M solution of TBAP in CH<sub>2</sub>Cl<sub>2</sub> containing the sample was purged with nitrogen for 20 min, and then the voltammograms were recorded at room temperature.

Single crystals of **4** was obtained slow slow diffusion of acetonitrile into a concentrated solution of **4** in chloroform/THF 100/1). Single crystal **4** was mounted on a MicroMount (MiTeGen). Crystallographic data of the compounds were recorded on a Bruker D8 VENTURE single crystal X-ray diffractometer equipped with PHOTON 100 CMOS detector and KryoFlex II low-temperature apparatus operating at 100K, using graphite monochromatized MoK $\alpha$  radiation ( $\lambda=0.71073$  Å). All of the data were corrected for absorption effects using the multiscan method. The structures were solved by direct methods and refined on F<sup>2</sup> by fullmatrix least-squares using SHELXL 2014[1]. All the hydrogen atoms were added to their geometrically ideal positions. All non-hydrogen atoms were refined with anisotropic displacement parameters. Crystal data and structure refinement details are summarized in **Table S1**.

## Fabrication and characterization of OFET

OFETs were fabricated on (100) oriented p-type silicon wafers in the bottom gate top contact configuration. After standard RCA cleaning of Si substrates, 250 nm Aluminum (Al) metal with a purity of 99.99% was thermally evaporated onto the back side of the Si wafer to form ohmic contact, followed by heat treatment at 500 °C for 5 min in dry nitrogen (N<sub>2</sub>) atmosphere. Before spin coating of gate dielectric, the native oxide on the Si surface was removed in HF/H<sub>2</sub>O (1:10) solution and then washed with de-ionized water and finally dried with N<sub>2</sub> gas. Thin film of gate dielectric, polymethylmethacrylate (PMMA), was obtained by spin coating process from a THF solution of PMMA. Thickness of the PMMA film was ~ 120 nm, determined by ellipsometric technique. After the PMMA film formation, in order to investigate the PMMA-p-Si interface

gold (Au) metal contacts were deposited onto the PMMA surface by thermal evaporation of Au through a metal shadow mask. For OFET studies, a solution of **4** with a concentration of  $5 \times 10^{-4}$  M in DMF was spun on top of PMMA film at 2000 rpm for 90 s and the films were thermally treated at 110 °C for 20 min to evaporate the solvent. Finally, on the top of active layer (compound **4** in our case), Au source and drain electrodes with thickness of 200 nm was deposited by thermal evaporation through a metal shadow mask with a channel width (W) of 4 mm and a channel length (L) of 100  $\mu$ m. Electrical measurements, transfer and output characteristics of the OFET device, were performed in ambient atmosphere using a Keithley 2400 source-meter and Keithley 617 programmable electrometer.

### UV-Vis Spectra of **3** and **4**

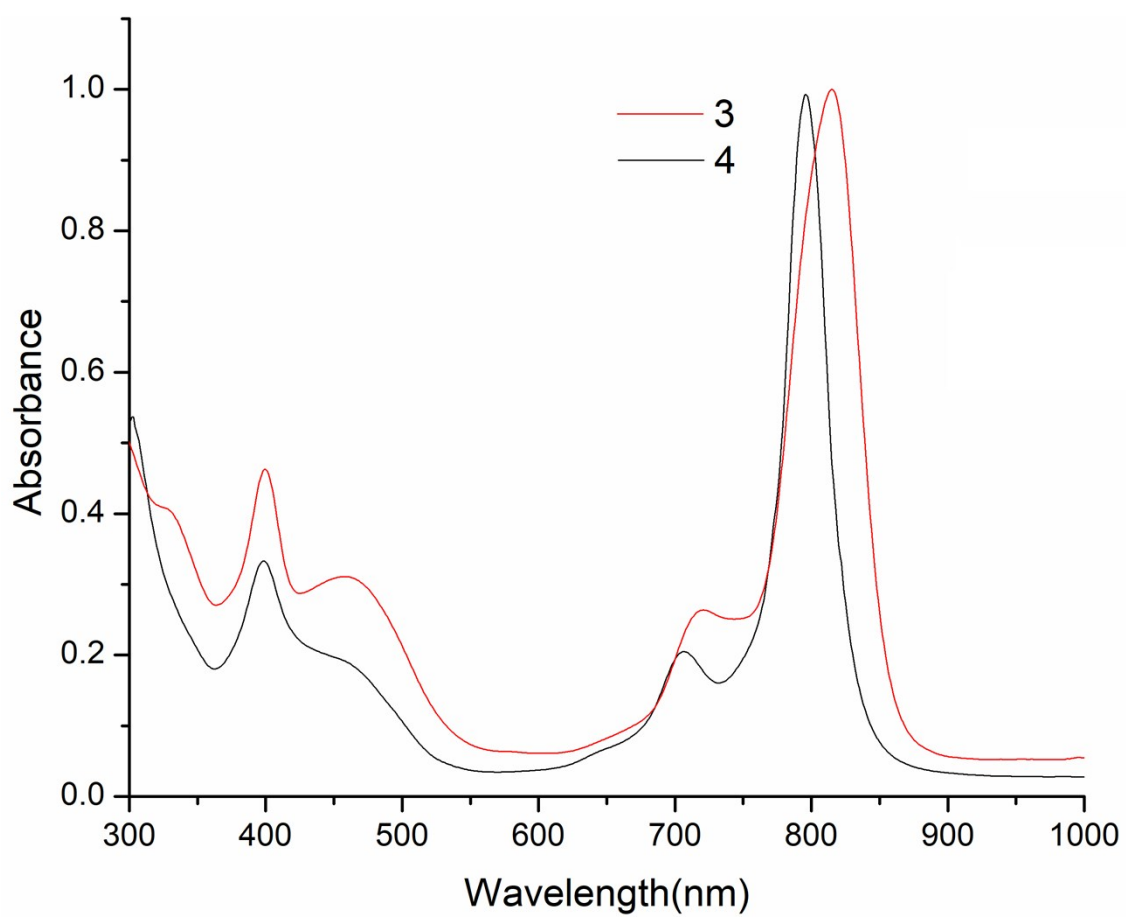

**Fig. S1** UV-Vis spectrum of **3** and **4** in  $\text{CHCl}_3$ .

## NMR spectra of 3 and 4

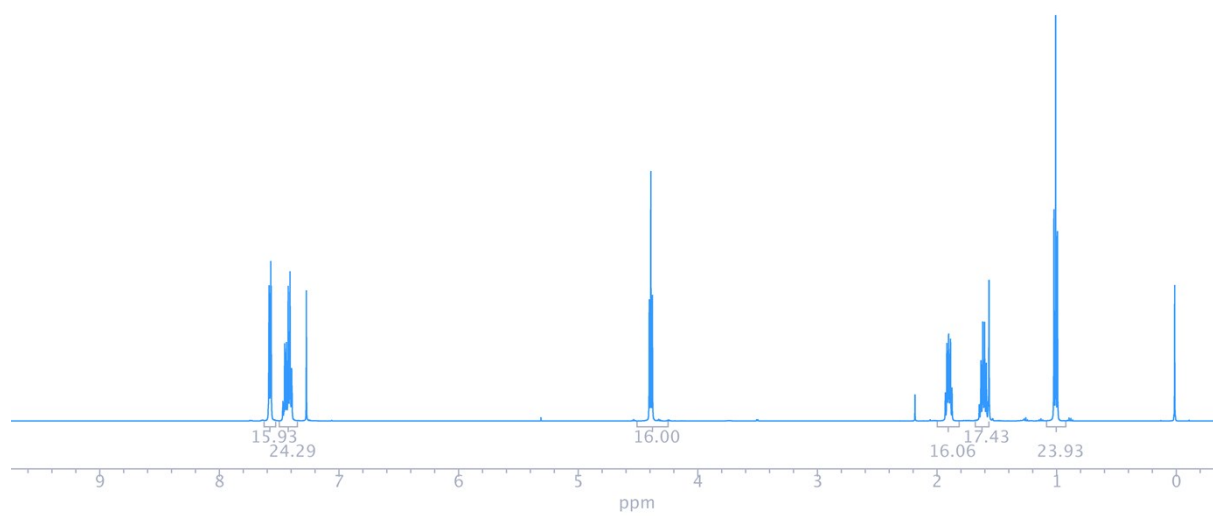

**Fig. S2**  $^1\text{H}$  NMR spectrum of **2** in  $\text{CDCl}_3$ .

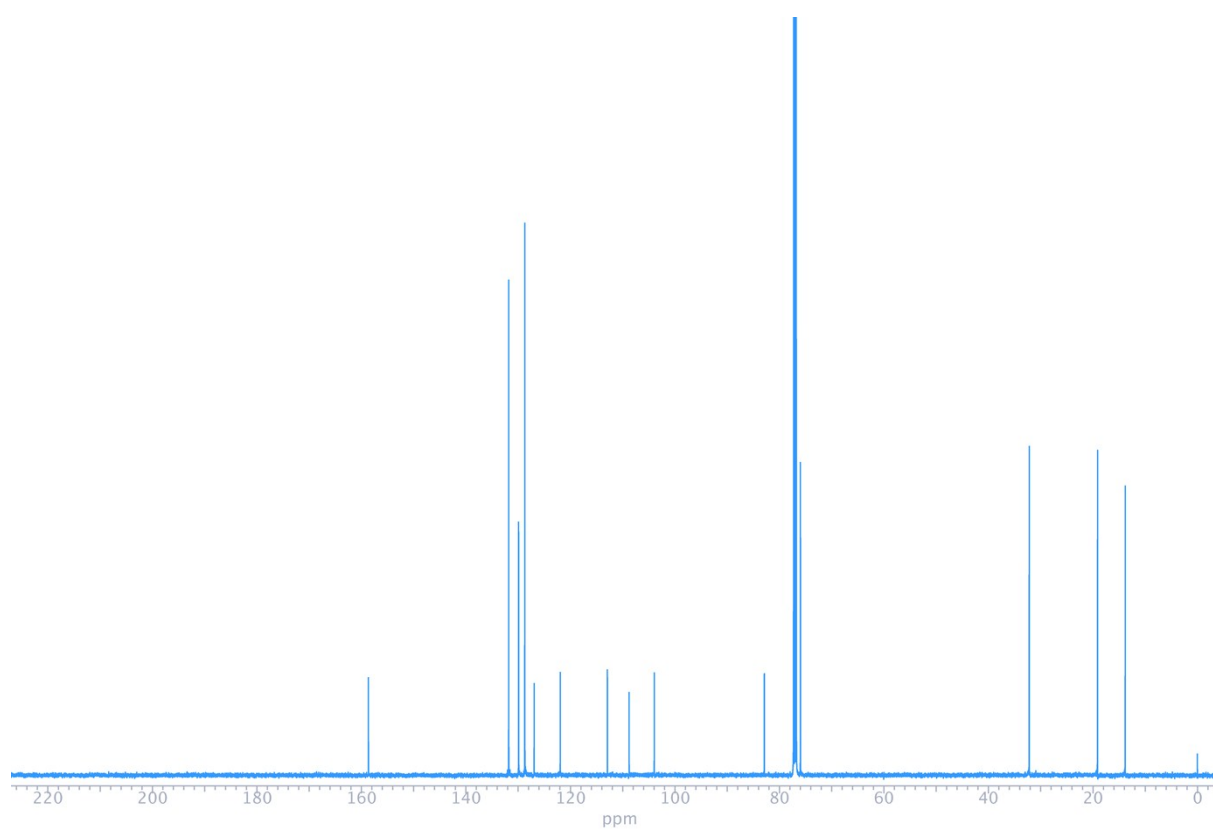

**Fig. S3**  $^{13}\text{C}$  NMR spectrum of **2** in  $\text{CDCl}_3$ .

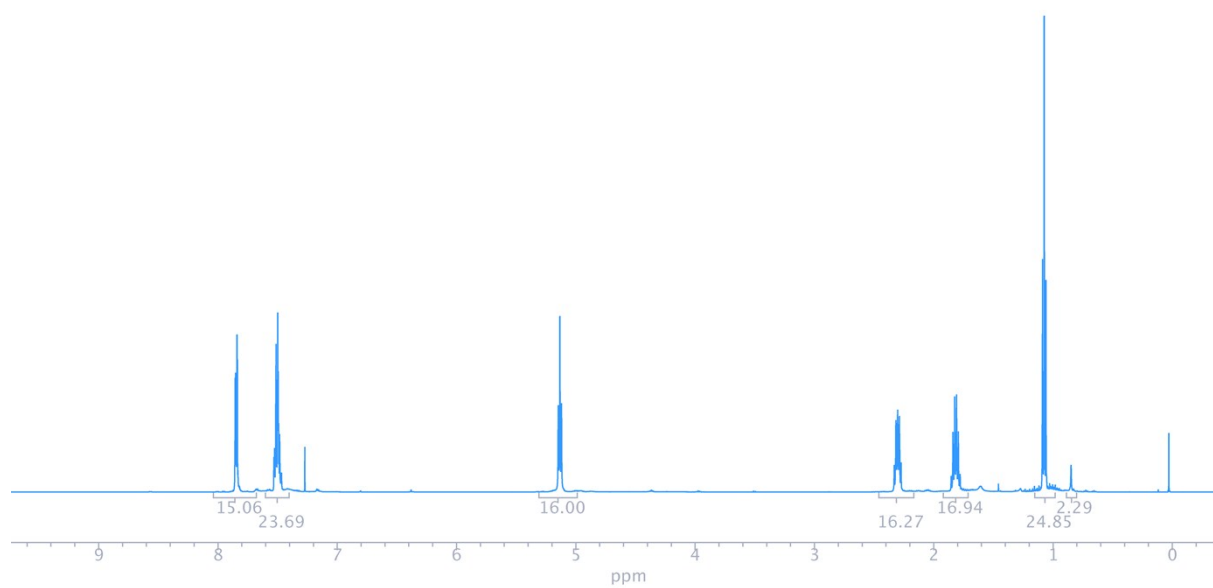

**Fig. S4** <sup>1</sup>H NMR spectrum of **3** in CDCl<sub>3</sub>.

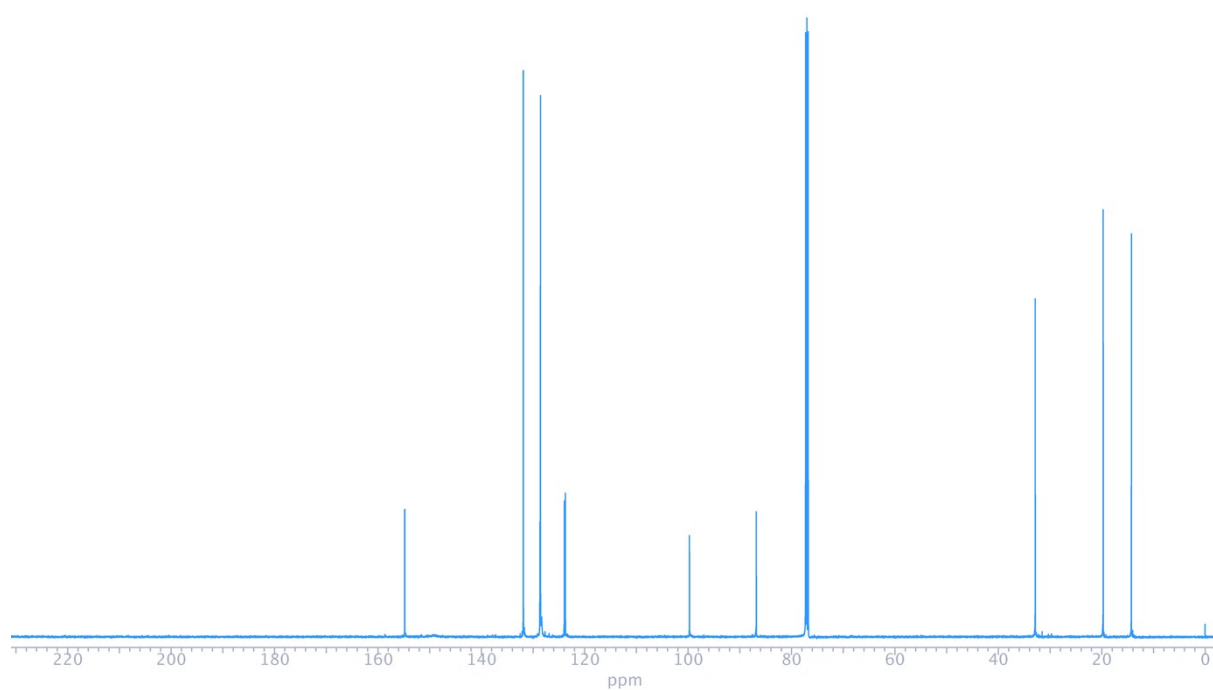

**Fig. S5** <sup>13</sup>C NMR spectrum of **3** in CDCl<sub>3</sub>.

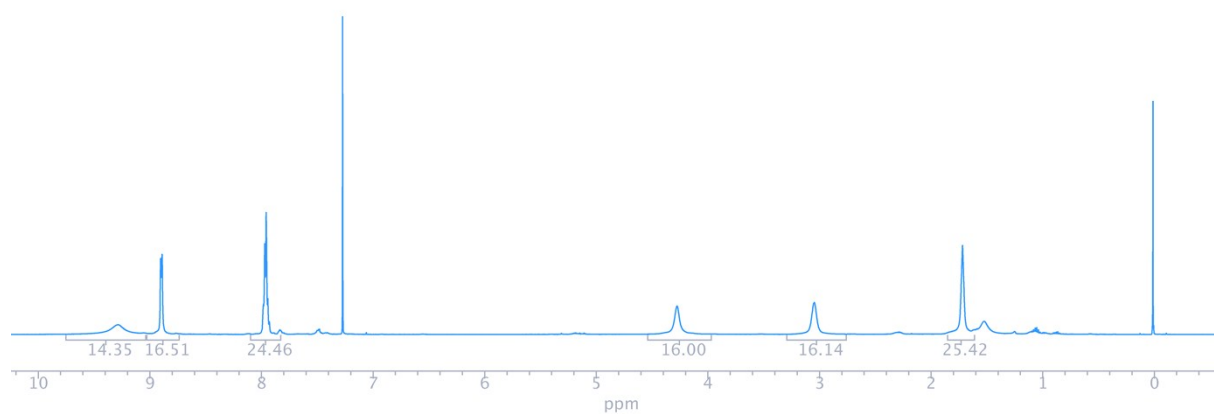

**Fig. S6**  $^1\text{H}$  NMR spectrum of **4** in  $\text{CDCl}_3$ .

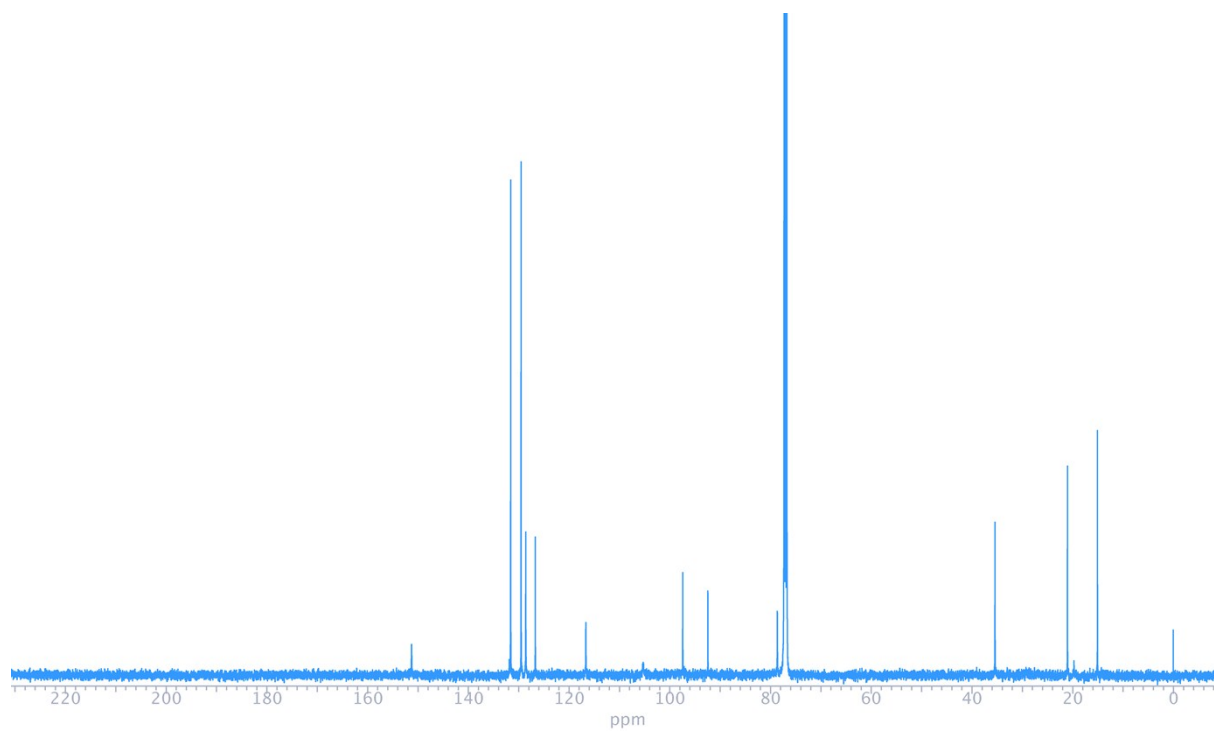

**Fig. S7**  $^{13}\text{C}$  NMR spectrum of **4** in  $\text{CDCl}_3$ .

### X-ray structure of 4

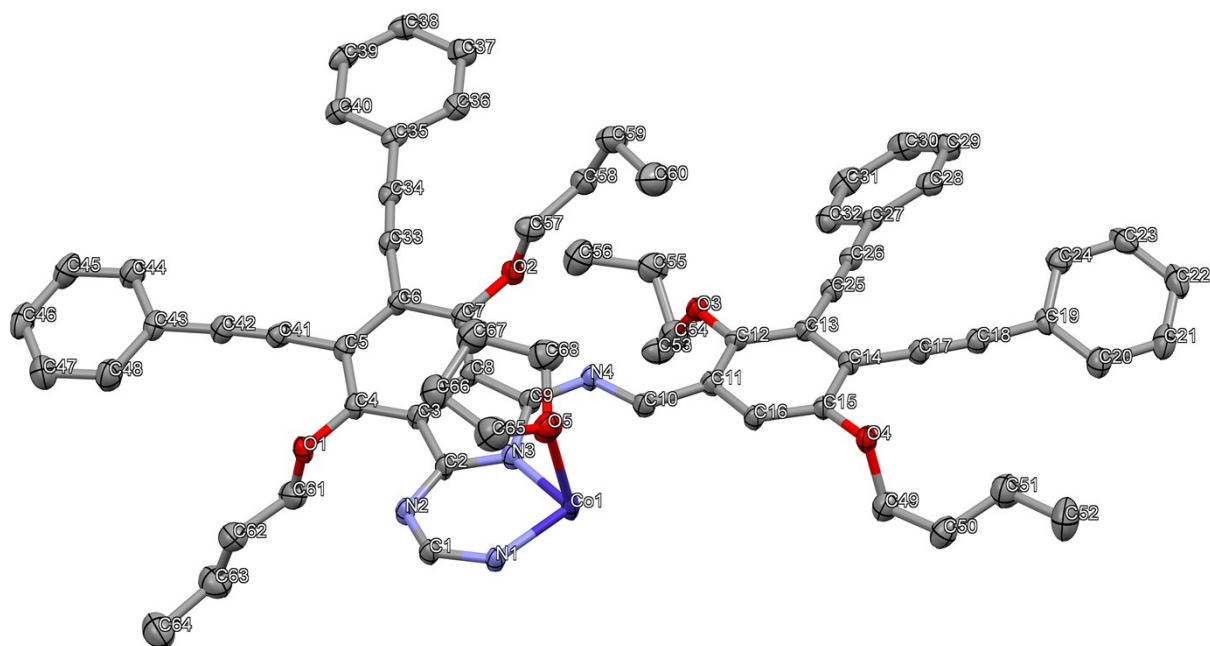

**Fig. S8** Asymmetric unit structure of **4** with atomic numbering.



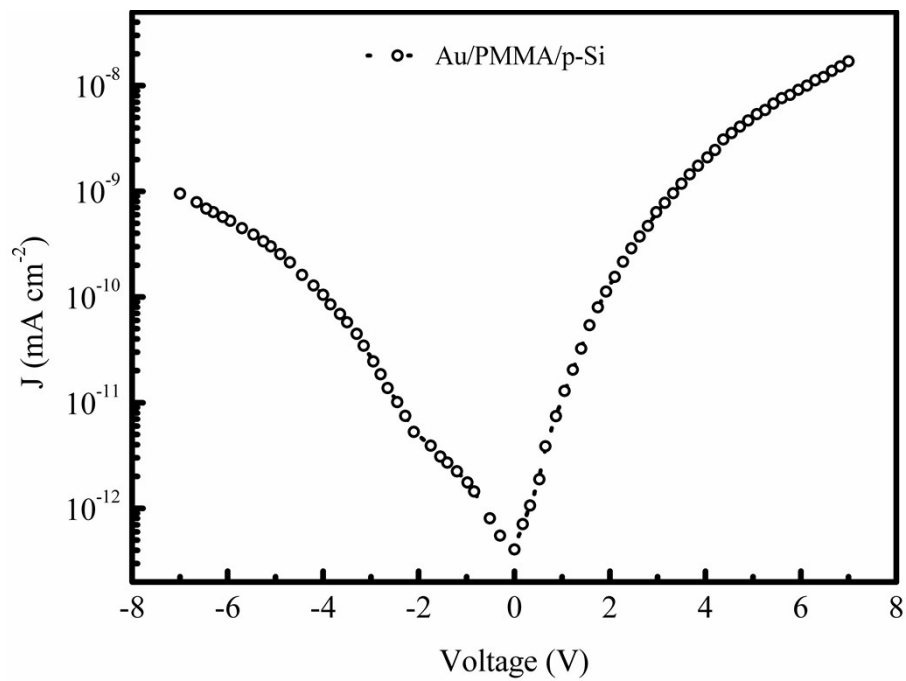

**Fig. S9** J-V characteristic of the Au/PMMA/p-Si structure.

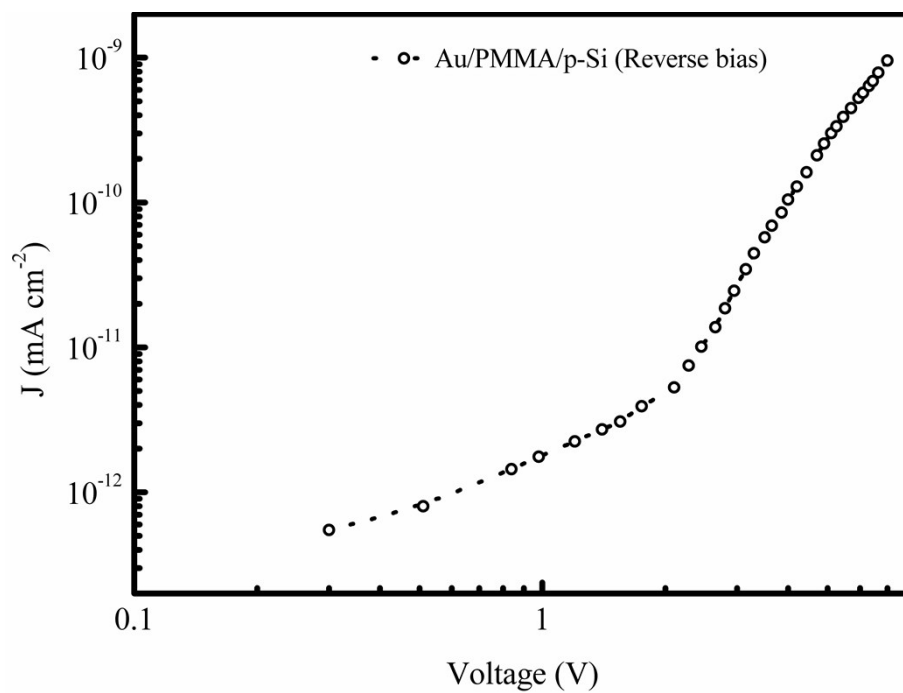

**Fig. S10** Reverse bias J-V characteristic of the device.

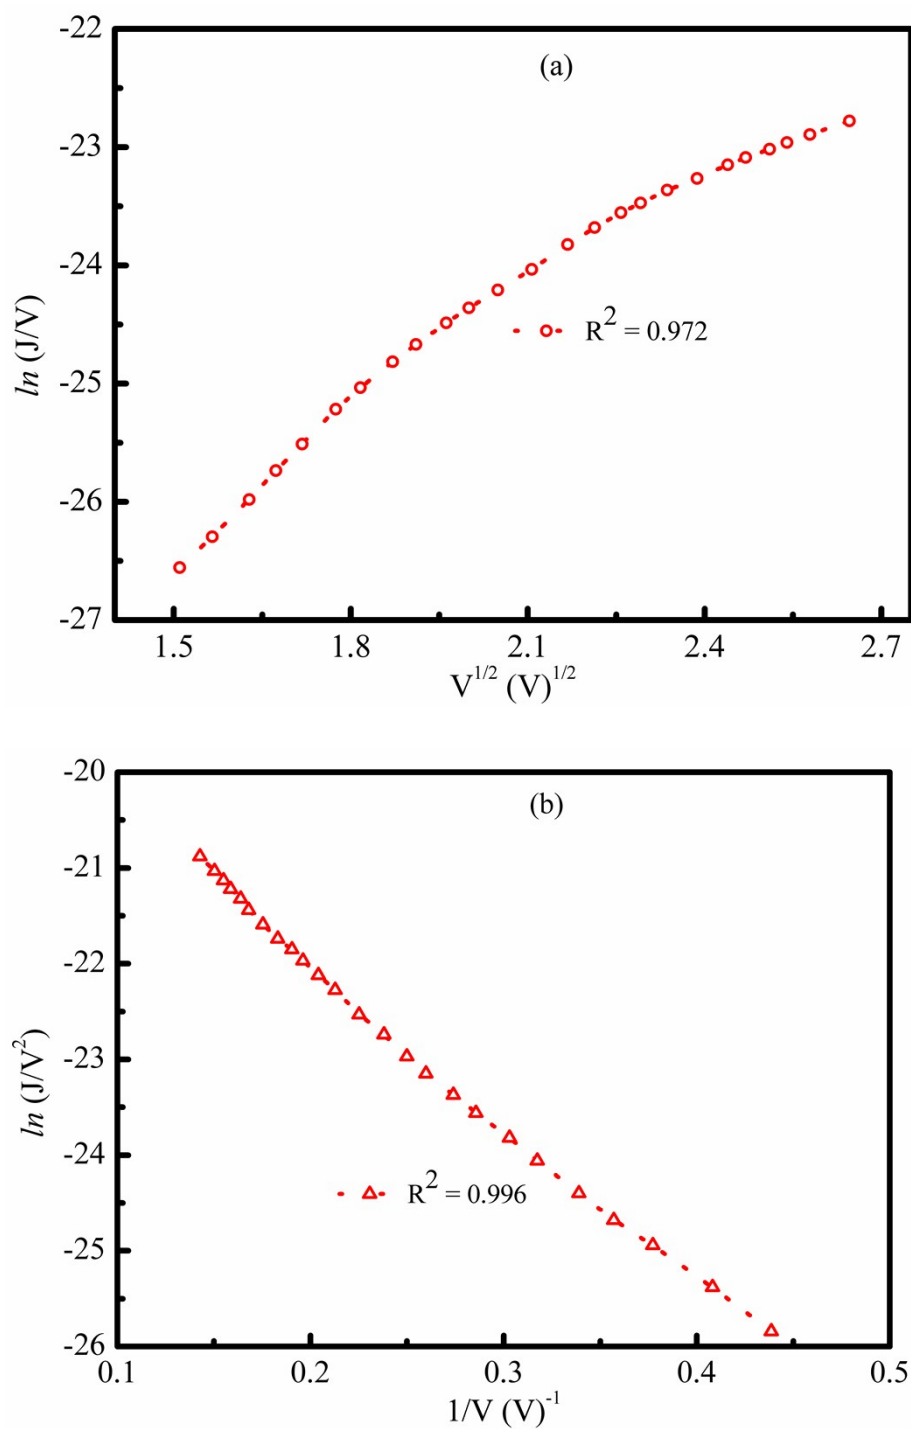

**Fig. S11** Modelling of the J-V data according to (a) Pole-Frenkel emission (b) Fowler–Nordheim tunnelling.

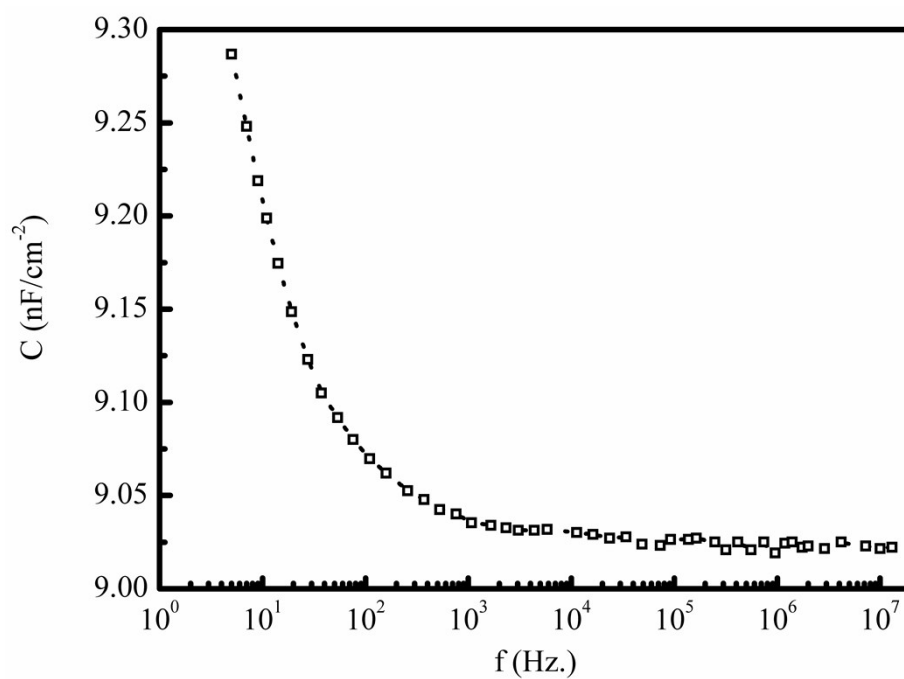

**Fig. S12** Frequency dependence of the capacitance density for the Au/PMMA/p-Si structure.

**Table S1. Crystal data and structure refinement details for compounds 4**

|   |
|---|
| 4 |
|---|

| 4                                                        |                                                                    |
|----------------------------------------------------------|--------------------------------------------------------------------|
| CCDC number                                              | 1825468                                                            |
| Empirical formula                                        | C <sub>136</sub> H <sub>128</sub> CoN <sub>8</sub> O <sub>10</sub> |
| Formula weight (g/mol)                                   | 2093.39                                                            |
| <i>T</i> (K)                                             | 100                                                                |
| $\lambda$ (Å)                                            | 0.71073                                                            |
| Crystal system, space group                              | Triclinic, P -1                                                    |
| <i>Unit cell dimensions: (Å, °)</i>                      |                                                                    |
| <i>a</i>                                                 | 8.0365(6)                                                          |
| <i>b</i>                                                 | 18.6296(14)                                                        |
| <i>c</i>                                                 | 20.1267(15)                                                        |
| $\alpha$                                                 | 66.46(2)                                                           |
| $\beta$                                                  | 83.003(3)                                                          |
| $\gamma$                                                 | 82.317(3)                                                          |
| <i>V</i> (Å <sup>3</sup> )                               | 2723.0(4)                                                          |
| <i>Z</i>                                                 | 1                                                                  |
| Absorption coefficient (mm <sup>-1</sup> )               | 0.225                                                              |
| D <sub>calc</sub> (g/cm <sup>3</sup> )                   | 1.273                                                              |
| <i>F</i> (000)                                           | 1107                                                               |
| Crystal size (mm)                                        | 0.12x0.18x0.24                                                     |
| $\theta$ Range for data collection (°)                   | 2.21–25.24°                                                        |
|                                                          | $-9 \leq h \leq 9$                                                 |
| Index ranges                                             | $-22 \leq k \leq 22$                                               |
|                                                          | $-24 \leq l \leq 24$                                               |
| Reflections collected                                    | 72585                                                              |
| Independent reflections                                  | 6718                                                               |
| Max. and min. transmission                               | 0.746 and 0.648                                                    |
| Final <i>R</i> indices [ <i>I</i> ≥ 2σ( <i>I</i> )]      | <i>R</i> 1 = 0.0634,<br><i>wR</i> 2 = 0.1455                       |
| <i>R</i> indices (all data)                              | <i>R</i> 1 = 0.1123,<br><i>wR</i> 2 = 0.1713                       |
| Goodness-of-fit on <i>F</i> <sup>2</sup>                 | 1.038                                                              |
| Largest difference in peak and hole (e Å <sup>-3</sup> ) | 0.737/–0.407                                                       |

## References

1. G. Sheldrick, *Acta Crystallographica Section C* **2015**, 71, 3-8.
